# Supplementary material for: Detection of mild cognitive impairment by spinal posture assessment in health exams of the general older population: A Japanese cohort survey randomly sampled from a basic resident registry
Source: Research Square preprint supplement (doi:10.21203/rs.3.rs-861016/v1), 2021-09-03
Supplement: Supplementary file 1 [file 01226acf07503eda8711f0e1.docx]

Table 3. Positive likelihood ratio matrix for mild cognitive impairment prediction.

|  |  | **SVA (mm)** |  |  |  |  |  |  |
| --- | --- | --- | --- | --- | --- | --- | --- | --- |
| **Sex** | **Age (years)** | **Any SVA** | **≥ 50** | **≥ 60** | **≥ 70** | **≥ 80** | **≥ 90** | **≥ 100** |
| **Male** | **Any age** | - | 3.45 | 2.83 | 2.93 | 2.16 | 2.30 | **6.04**† |
|  | **≥ 60** | 1.41 | 3.23 | 2.83 | 2.93 | 2.16 | 2.30 | **6.04**† |
|  | **≥ 70** | 2.33 | 3.88 | 3.45 | 4.31 | 3.88 | **6.04**† | **5.17**† |
|  | **≥ 80** | 4.68 | 4.10 | 4.31 | **5.61**† | **6.90**† | **Inf**†† | **Inf**†† |
|  |  |  |  |  |  |  |  |  |
| **Female** | **Any age** | - | 2.70 | 3.39 | **5.13**† | **9.17**† | **6.48**† | **8.63**† |
|  | **≥ 60** | 1.43 | 2.70 | 3.39 | **5.13**† | **9.17**† | **6.48**† | **8.63**† |
|  | **≥ 70** | 2.16 | 3.24 | 3.60 | **6.48**† | **8.63**† | **6.48**† | **8.63**† |
|  | **≥ 80** | 4.68 | 4.59 | 4.68 | **12.95**†† | **11.87**†† | **10.79**†† | **7.55**† |

*Notes:* Values indicate positive likelihood ratios for the combination of age and SVA. Ratios ≥ 5† and ≥ 10 †† are indicated.

*Abbreviations:* SVA, sagittal vertical axis; Inf, infinite.
