# Supplementary material for: Detection of mild cognitive impairment by spinal posture assessment in health exams of the general older population: A Japanese cohort survey randomly sampled from a basic resident registry
Source: Research Square preprint supplement (doi:10.21203/rs.3.rs-861016/v1), 2021-09-03
Supplement: Supplementary file 2 [file 67b56cf25613cb8bf57df392.docx]

Table 2. Univariate and multivariate analyses on the association of mild cognitive impairment with age and spinal balance.

|  |  | **Univariate analysis** |  |  | **Multivariate analysis** |  |
| --- | --- | --- | --- | --- | --- | --- |
| **Sex** | **Candidate** | **Odds ratio** | ***p*-value** |  | **Odds ratio** | ***p*-value** |
| Male | Age (+10 years) | 2.5 (1.9-3.4) | < 0.01 |  | 2.1 (1.5-2.9) | < 0.01 |
|  | SVA (+10 mm) | 1.3 (1.1-1.4) | < 0.01 |  | 1.2 (1.0-1.3) | < 0.01 |
| Female | Age (+10 years) | 2.6 (1.9-3.5) | < 0.01 |  | 2.4 (1.7-3.4) | < 0.01 |
|  | SVA (+10 mm) | 1.2 (1.1-1.3) | < 0.01 |  | 1.0 (1.0-1.1) | 0.49 |

*Note:* Odds ratios are presented with the 95% confidence interval.

*Abbreviation:* SVA, sagittal vertical axis.
