# Supplementary material for: Detection of mild cognitive impairment by spinal posture assessment in health exams of the general older population: A Japanese cohort survey randomly sampled from a basic resident registry
Source: Research Square preprint supplement (doi:10.21203/rs.3.rs-861016/v1), 2021-09-03
Supplement: Supplementary file 3 [file 7d1bbde3a22ff7fd8eab24e3.docx]

Table 1. Cognitive function test scores and prevalence rates of cognitive impairment.

| **Sex** | **Age**  **(years)** | **N** | **MoCA** | | **MMSE** | |
| --- | --- | --- | --- | --- | --- | --- |
|  |  |  | Score | < 26 points | Score | < 24 points |
| Male | 50's | 50 | 27 ± 2 | 14 (28%) | 29 ± 1 | 0 (0%) |
|  | 60's | 53 | 26 ± 3 | 22 (42%) | 28 ± 2 | 1 (2%) |
|  | 70's | 55 | 24 ± 3 | 35 (64%) | 27 ± 2 | 4 (7%) |
|  | 80's | 45 | 21 ± 4 | 39 (87%) | 26 ± 3 | 8 (18%) |
|  |  |  |  |  |  |  |
| Female | 50's | 47 | 27 ± 2 | 8 (17%) | 29 ± 1 | 0 (0%) |
|  | 60's | 61 | 26 ± 3 | 25 (41%) | 28 ± 2 | 2 (3%) |
|  | 70's | 54 | 25 ± 3 | 29 (54%) | 28 ± 2 | 2 (4%) |
|  | 80's | 48 | 21 ± 4 | 39 (81%) | 26 ± 2 | 5 (10%) |

*Notes:* Values represent the mean ± standard deviation or number of cases concerned (rate). The maximum MoCA score is 30 points, with a score of ≥ 26 considered normal (i.e., without mild cognitive impairment). The maximum MMSE score is 30 points, with a score of ≥ 24 regarded as normal (i.e., without dementia).

*Abbreviations:* MoCA, Montreal Cognitive Assessment; MMSE, Mini-Mental State Examination.
