# Supplementary material for: Detection of mild cognitive impairment by spinal posture assessment in health exams of the general older population: A Japanese cohort survey randomly sampled from a basic resident registry
Source: Research Square preprint supplement (doi:10.21203/rs.3.rs-861016/v1), 2021-09-03
Supplement: Supplementary file 4 [file 8b3acd80a2dcb478450c7e7c.docx]

Table 4. Characteristics of the study cohort.

| **Sex** | **Age**  **(years)** | **N** | **Height**  **(cm)** | **Weight**  **(kg)** | **BMI**  **(kg/m2)** | **Job**  **(Pri; Sec;  Ter; None)** |
| --- | --- | --- | --- | --- | --- | --- |
| Male | 50's | 50 | 171.8 ± 6.0 | 67.1 ± 9.1 | 22.7 ± 2.9 | 3; 7; 40; 0 |
|  | 60's | 53 | 166.7 ± 4.7 | 66.9 ± 7.7 | 24.1 ± 2.7 | 18; 5; 19; 11 |
|  | 70's | 55 | 163.2 ± 5.0 | 60.0 ± 10.3 | 22.5 ± 3.4 | 22; 2; 8; 23 |
|  | 80's | 45 | 160.1 ± 5.7 | 57.5 ± 8.5 | 22.4 ± 2.8 | 19; 0; 3; 23 |
|  | All | 203 | 165.6 ± 6.8 | 63.0 ± 9.8 | 22.9 ± 3.0 | 62; 14; 70; 57 |
|  |  |  |  |  |  |  |
| Female | 50's | 47 | 158.1 ± 4.9 | 55.4 ± 9.0 | 22.2 ± 3.8 | 5; 4; 29; 9 |
|  | 60's | 61 | 152.8 ± 5.4 | 52.2 ± 7.6 | 22.3 ± 2.8 | 21; 4; 17; 19 |
|  | 70's | 54 | 149.7 ± 5.3 | 50.6 ± 7.9 | 22.6 ± 3.2 | 16; 4; 8; 26 |
|  | 80's | 48 | 144.6 ± 5.9 | 48.3 ± 7.9 | 23.1 ± 3.3 | 11; 0; 5; 32 |
|  | All | 210 | 151.3 ± 7.1 | 51.6 ± 8.4 | 22.5 ± 3.2 | 53; 12; 59; 86 |

*Notes:* Table cited from a previous study. 21 Values represent the mean ± standard deviation.

*Abbreviations:* BMI, body mass index; Pri, primary sector; Sec, secondary sector; Ter, tertiary sector.
